# Supplementary material for: Mesenchymal Stem Cells Protect Against Ferroptosis via Exosome-Mediated Stabilization of Xct in Acute Liver Injury
Source: Research Square preprint supplement (doi:10.21203/rs.3.rs-530971/v1), 2021-05-27
Supplement: Supplementary file 1 [file 3cf91cd995dc22997c2f3abf.docx]

**Supporting information**

**Preparation of mesenchymal stem cells**

The humerus, tibia and femur of C57BL/6 pup mice were removed, the bone marrow cavity was rinsed and cut into pieces, and the bone slices were transferred to the digestive solution containing type II collagenase for oscillation digestion at 37℃ for 1 h. The upper digestive fluid was absorbed and discarded, and the bone slices were cleaned repeatedly with the culture solution. The bone slices were inoculated into a 10 cm plate containing complete culture solution and incubated at 37℃ with 5% CO2 for 3 days. On the third day, the fresh medium was replaced and cultured in the incubator at 37℃ with 5% CO2 for another 2 days. Finally, we can find the colonies of cells, which are primary MSCs cells, crawling out of the bone fragments. We have obtained a patent for this technology. The patent number is ZL 2017 1 0628074.3.

**Visualization of lipid peroxidation**

Liver tissue collected previously was cut into pieces and digested in a RPMI 1640 solution supplemented with Type-Ⅱ collagenase (1mg/ml) and DNase (0.1mg/ml) at 37 ° c for 60 min. Passed through the digested tissue using a 70μm cell strainer and subsequently centrifuged at 4℃ with 500 g. The cell pellet was treated with ACK lysing buffer on ice for 5 min to remove the red blood cells. Next, re-suspended the liver cells in 500 μL PBS containing C11-BODIPY581/591 (2.5 μM) and incubated at 37℃ for 30 min in a tissue culture incubator. Finally, cells were washed twice with PBS, strained through a 70μM cell strainer and analyzed by using a flow cytometer. Laser for excitation was 488 nm and data were collected from the FL1 channel. Data were collected to 10000 cells for each sample.

**Western Blotting analysis**

Total protein was extracted from fresh liver tissue using Total Protein Extraction Kit for animal Cultured Cells and Tissues (Cat No. SD-001/SN-002; Invent Biotechnologies). Protein concentration was measured using the BCA protein assay kit (P0012S; Beyotime). Next, a total of 20-30 µg protein of each sample was first resolved by a 12% SDS-PAGE, then transferred to a nitrocellulose membrane. Subsequently, the membranes were blocked with 5% BSA and incubated with the primary antibody at 4℃ overnight. After incubation with secondary antibodies, the signals on the membranes were visualized by SuperSignal™ West Pico PLUS Chemiluminescent Substrate (34577; ThermoFisher). The following antibodies were used: Anti-Ubiquitin (ab134953; Abcam), xCT/SLC7A11 (D2M7A; Cell signaling), Anti-OTUB1(ab175200; Abcam), Anti-CD44 (ab189524; Abcam), Anti-xCT (ab175186; Abcam), Anti-CD44 (ab119348; Abcam), Histone H3 (D1H2) XP® Rabbit mAb (44999; Cell signaling), Rabbit monoclonal [EPR5702] to CD63 (ab134045; Abcam), Rabbit monoclonal [EPR4244] to CD81 (ab109201; Abcam), Goat Anti-Rabbit IgG H&L (HRP) (ab6721; Abcam).

**Measurement of ROS, MDA and Cell viability**

We selected a kit (S0131S; Beyotime) to detect the content of hepatic malondialdehyde (MDA) and a GSH assay kit (703002; Cayman Chemical, Arbor, USA) to measure the content of GSH. Cell Counting Kit-8 viability assay (Sigma-Aldrich) was used to determine cell viability. ROS was measured using FACS with H2DCFDA (Sigma-Aldrich) staining.

**Condition of UPLC-MS/MS method**

The chromatographic separation was achieved using an Amide C18 (2.1 × 100 mm, 1.7 µm) column, connected to ACQUITY UPLC and Xevo TQ-S Micro triple quadrupole mass spectrometer and maintained at 30℃.Samples (1µl) were injected onto the column and eluted at a flow rate of 0.4 mL/min (0-3.0 min) under gradient conditions consisting of 0.1% ammonia water (solvent A) and acetonitrile (solvent B). Gradient conditions were as follows: 0.0–0.3 min, 70% B; 0.3–1.0 min, 70-30% B; 1.0–2.0 min, 30% B; 2.0–2.3 min, 30%-70% B; 2.3-3.0 min, 70% B.  The mass spectrometer source utilized the multiple monitoring (MRM) mode with an ESI (source temperature 150℃, flow 150 L/h; de-solvation temperature 600 ℃, flow 1000 L/h) in positive ion mode at 2.5 kV. The UPLC-MS/MS data were analyzed using Masslynx 4.1 software (Waters Corp, Milford, MA, USA).

**Exosomes labeling and tracking in mice**

Mouse models of acute liver injury were established as previously described. The isolated exosomes were labelled in 5 µM DiR (D12731; ThermoFisher). Labelled exosomes from MSC conditional medium were injected via tail vein into 8 weeks old male mice with or without acute liver injury. Untreated mice was selected as control. About 1-3 h post injection, all mice were sedated by isoflurane and imaged on an IVIS Spectrum (PerkinElmer). Next, the mice were euthanized by cervical dislocation and organs were dissected and imaged. Excitation and emission filters at 750 nm and 800 nm were selected to detect the fluorescence.

**CCl4-induced hepatocytes injury in vitro**

Before experiment, all kinds of plates were coated with collagen coating solution (125-50; Sigma-Aldrich) and dried naturally. Primary hepatocytes were seeded in 96-well plate (3×103 cells/well) or 6-well plate (1×105 cells/well), cells were treated with medium containing 4mM, 6 mM, 8 mM, 9 mM, 10 mM, 11 mM, 12 mM CCl4 for 24 h, 48 h, 72h. Medium containing DMSO was control. Cell viability were measured by Cell Counting Kit-8 viability assay. Next, various concentrations including 20µg, 40µg, and 80µg exosomes were applied to CCl4-induced injury hepatocytes. Cells were collected and RNA and protein and lipid peroxidation were detected.

**Immunofluorescence**

Mouse liver slides were dewaxed and rehydrated, then submerged into pre-heated antigen retrieval solution before blocking with 5% FBS. Next, the liver sliders were incubated with xCT antibodies at 4°C overnight. The next day after incubation with corresponding secondary antibody and nuclear staining with DAPI, the slides were observed by confocal laser microscopy.

**Supplementary Table S1** List of primer sequences

| Gene Name | Primer sequences |
| --- | --- |
| *Ptgs2*-F | TCCTGGAACATGGACTC |
| *Ptgs2*-R | GCTCGGCTTCCAGTATTGAG |
| *15-LOX*-F | GCGACGCTGCCCAATCCTAATC |
| *15-LOX*-R | CATATGGCCACGCTGTTTTCTACC |
| *12-LOX*-F | AGTGACACCGATGTGAAGGAG |
| *12-LOX*-R | CTCTCAGATGGTCACACTG |
| *5-LOX*-F | ACTACATCTACCTCAGCCTCATT |
| *5-LOX*-R | GGTGACATCGTAGGAGTCCAC |
| *GAPDH*-F | AGGAGAGTGTTTCCTCGTCC |
| *GAPDH*-R | TGCCGTGAGTGGAGTCATAC |
| *xCT*-F | GCTCGTAATACGCCCTGGAG |
| *xCT*-R | GGAAAATCTGGATCCGGGCA |
